# Supplementary material
Source: PubMed Central journal article supplement (PMC6396381)
Supplement: oc8b00763_si_001.pdf [file oc8b00763_si_001.pdf]

## Supporting information

### **Time-gated ratiometric detection with the same working wavelength to minimize the interferences from photon attenuation for accurate in vivo detection**

Shengming Cheng,<sup>†</sup> Bin Shen,<sup>†</sup> Wei Yuan,<sup>†</sup> Xiaobo Zhou,<sup>†</sup> Qingyun Liu,  
<sup>†</sup>Mengya Kong,<sup>†</sup> Yibing Shi,<sup>†</sup> Pengyuan Yang,<sup>†</sup> Wei Feng,<sup>†\*</sup> and Fuyou Li<sup>†\*</sup>

<sup>†</sup> Institutes of Biomedical Sciences & Department of Chemistry & State Key Laboratory of Molecular Engineering of Polymers, Fudan University, 220 Handan Road, Shanghai 200433, P.R. China

\* Correspondence should be addressed to W. F. (fengweifd@fudan.edu.cn) and F.Y.L. (fyli@fudan.edu.cn).

#### Experimental Section

**Materials:** All reagents and chemicals were obtained from commercial supplies. Rare earth oxides RE<sub>2</sub>O<sub>3</sub> (99.999%) (RE<sup>3+</sup>=Y<sup>3+</sup>, Nd<sup>3+</sup>) were purchased from Shanghai Yuelong New Materials Co. Ltd. Octadecene (ODE) (>90%) and oleic acid (OA) (>90%) were purchased from Sigma-Aldrich. Ethanol and cyclohexane were purchased from Adamas-beta Reagent. RECl<sub>3</sub> were prepared with the reported method dissolving the corresponding oxides in hydrochloric acid at elevated temperature and removing the solvent. All other chemical reagents of analytical grade were used directly without further purification. Balb/c mice (4 weeks) were purchased from the Second Military

Medical University and were housed under standard environmental conditions.

Animal procedures were in agreement with the guidelines of the Institutional Animal Care and Use Committee.

**Instruments:** X-ray powder diffraction (XRD) measurements were performed on a Bruker D8 diffractometer in the  $2\theta$  range of 10- 90°. Fluorescence emission spectra were measured on an Edinburgh FLS920 luminescence spectrometer. UV-Vis absorption spectra were performed on a Lambda 35 spectrophotometer. Transmission electron microscope (TEM) images were collected on a JEM 2010 operating at an acceleration voltage of 200 kV. Dynamic light scattering was tested in the NanoZS90. ICP-AES was tested in the iCAP 7400.

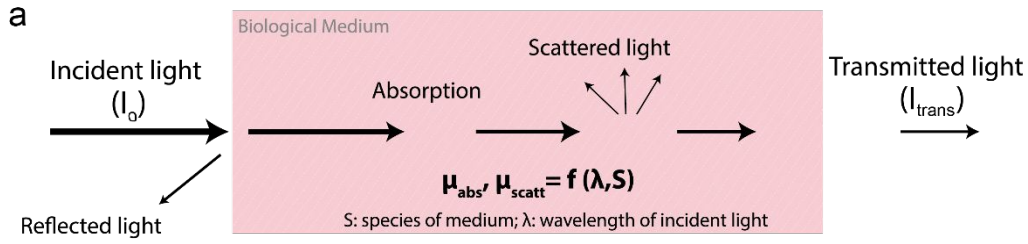

The intensity could be derived from radiance by integration over the solid angle as follows:

$$I(r) = \int_{4\pi} J(r, s) s d\omega \quad (1)$$

where  $J(r, s)$  is the radiance.

In photon transport theory, the radiative transport equation is as follows:

$$\frac{dJ(r, s)}{ds} = -\mu_t J(r, s) + \frac{\mu_s}{4\pi} \int_{4\pi} p(s, s') J(r, s') d\omega' \quad (2)$$

where  $p(s, s')$  is the phase function of a photon scattered from direction  $s'$  into  $s$ ,  $ds$  is an infinitesimal path length, and  $d\omega'$  is the elementary solid angle about the direction  $s'$ .

On the other hand, the radiance inside a turbid medium can be divided into a coherent and a diffuse term according to the following relationship

$$J = J_c + J_d \quad (3)$$

where  $J_c$  is coherent radiance and  $J_d$  is diffuse radiance.

When the diffuse term is noticeably smaller than the coherent term  $J_c + J_d \approx J_c$ , the intensity at a distance  $z$  from the tissue surface could be given by Lambert's law (First-Order Scattering) as follows:

$$I(z) = I_0 \exp[-(\mu_a + \mu_s)z] \quad (4)$$

When the scattering overwhelms the absorption, we could expand the diffuse radiance  $J_d$  in a series by<sup>1</sup>

$$J_d = 1/4\pi(I_d + 3F_d s + \dots) \quad (5)$$

where  $I_d$  is the diffuse intensity, and the vector  $F_d$  is determined by

$$F_d(r) = \int_{4\pi} J_d(r, s) s d\omega \quad (6)$$

In general, the diffusion approximation thus states that

$$I = I_c + I_d = A \exp(\mu_t z) + B \exp(\mu_{eff} z), \quad A + B = I_0 \quad (7) \quad ^2$$

where  $\mu_t = \mu_a + \mu_s$  and  $\mu_{eff} = [3\mu_a \mu_t (1-g)]^{1/2}$ ,  $g$  is the scattering anisotropy factor.

Figure S1. Schematic illustration of light transmitting into biological tissue.

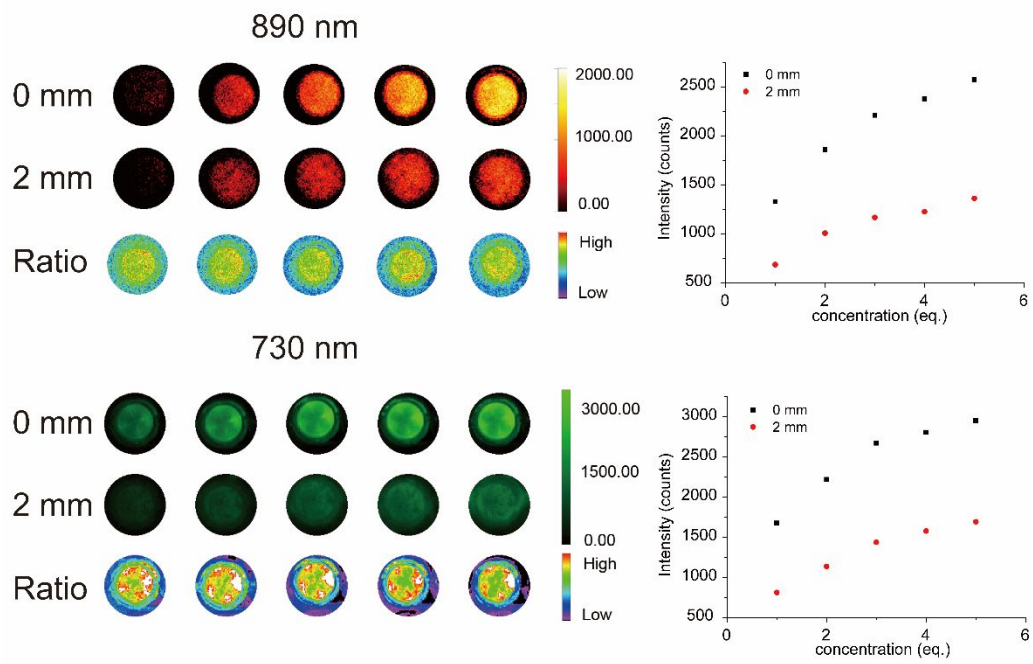

Figure S2. Images of light (730 nm and 890 nm) through 0 mm and 2 mm pork. the intensity of light with different wavelength (730 nm and 890 nm) undergone significant attenuation after transmitting 2 mm pork. But both of the k values of two groups did not change within the range of light intensity we measured (the ratio of  $I_{em}$  to  $I_{em}^{trans}$  is k).

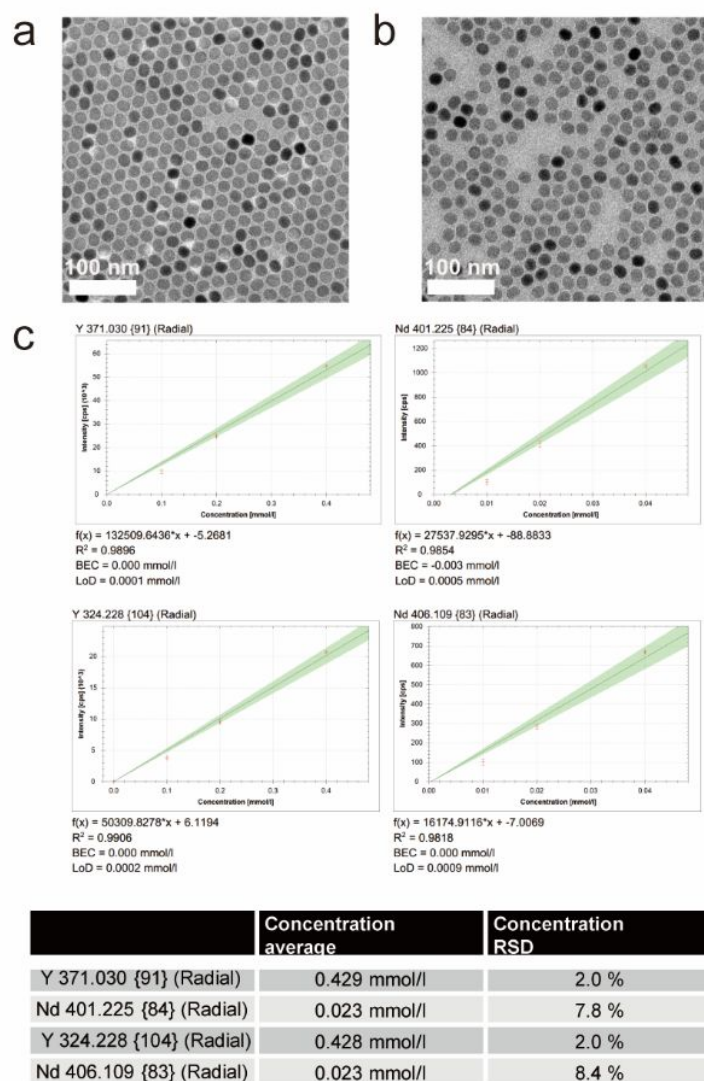

Figure S3. TEM image of NaYF<sub>4</sub>:Nd (a) and NaYF<sub>4</sub>:Nd@Cy860@PC (b), bar=100 nm.

(c) The concentration and composition of Nd<sup>3+</sup> and Y<sup>3+</sup> ions measured by ICP-AES.

The ratio of actual doped Nd<sup>3+</sup> ions is ~5.1%.

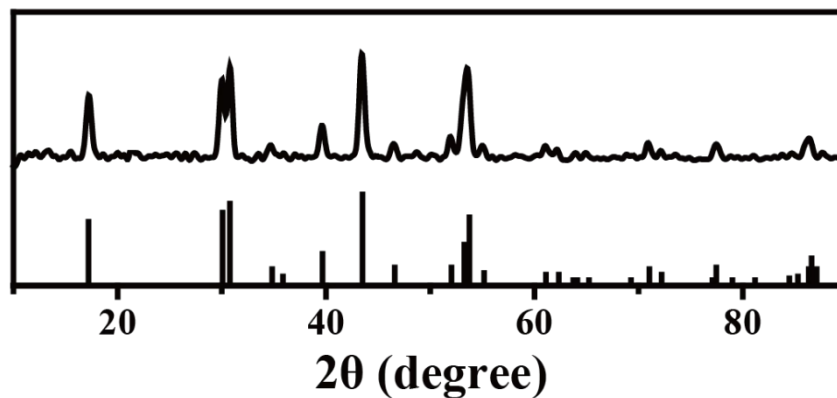

Figure S4. XRD patterns of OA- NaYF<sub>4</sub>: Nd (JCPDS no.16-0334).

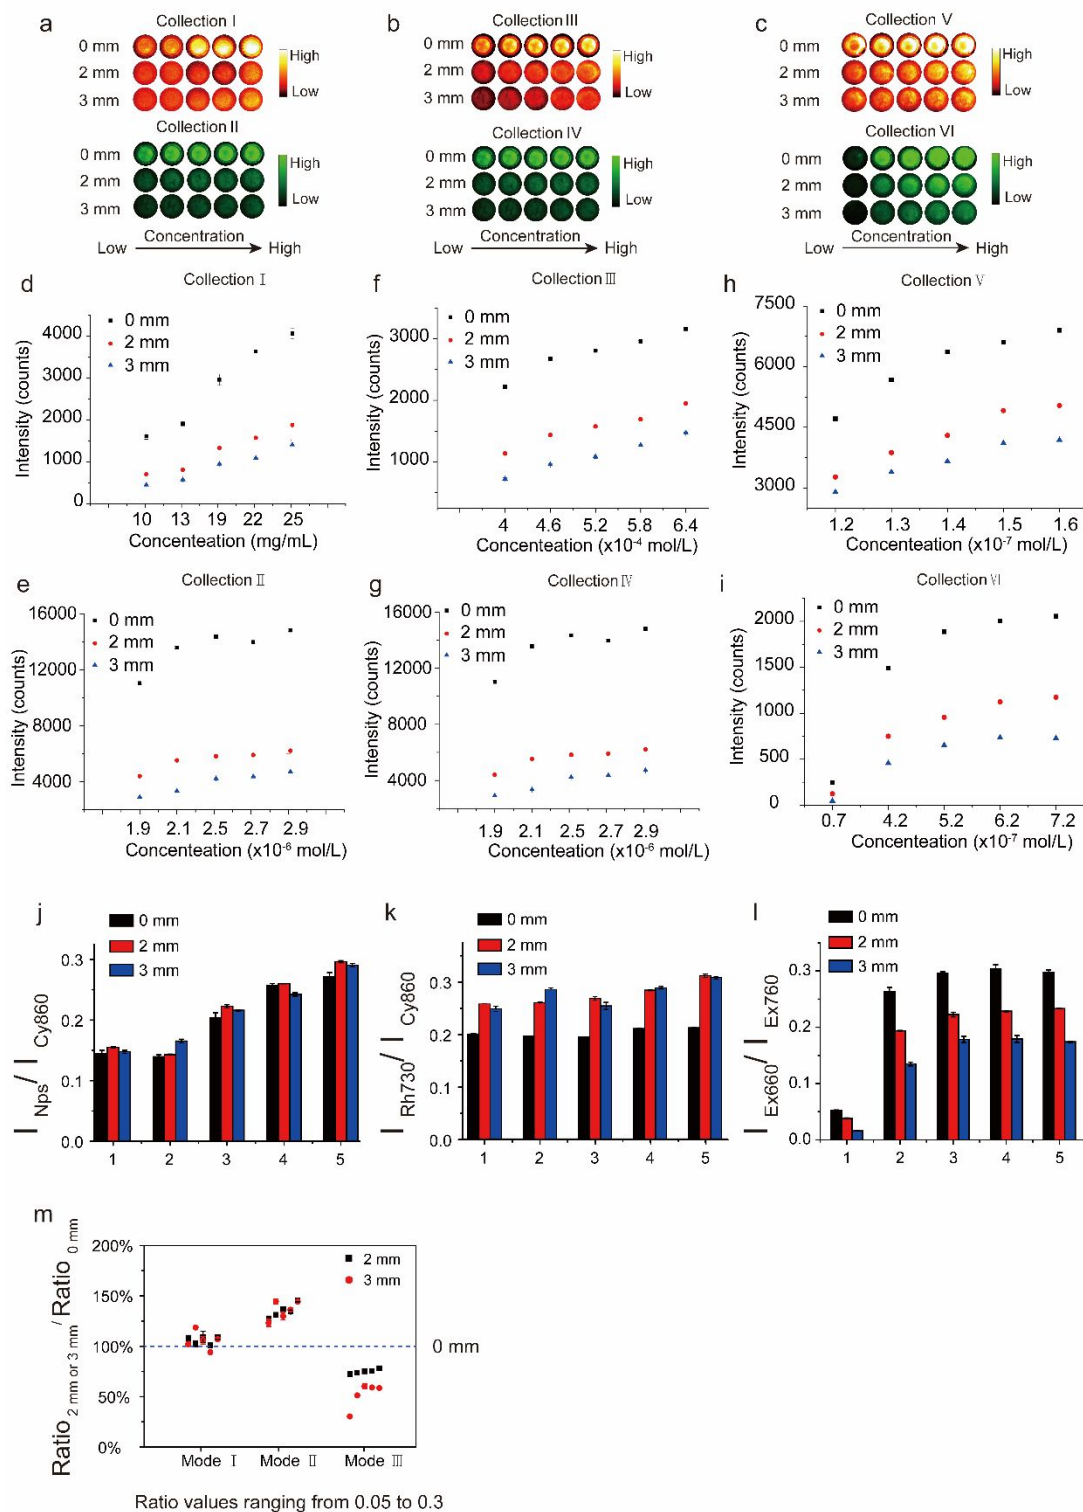

Figure S5. (a-c) Imaging pictures of six collection windows in which four types of emissive materials with different concentration are covered with different thick pork.

(d-i) Emission intensities of imaging pictures(a-c) (j-l) The ratio values of three imaging modes (the intensities in collection window I, III, VI to the intensities in collection window II, IV, V. (m) The deviations between the ratio signals measured with pork blocking and ratio signals without pork blocking in three modes when the ratio signals ranged from 0.05 to 0.3.

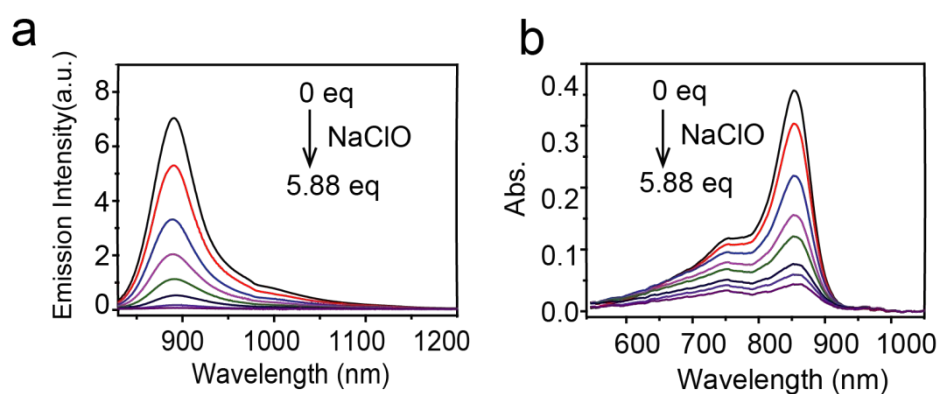

Figure S6. Changes in absorption spectra (a) and fluorescence emission spectra (b) of 2.7 μM solution of Cy860 upon gradual addition of NaClO.

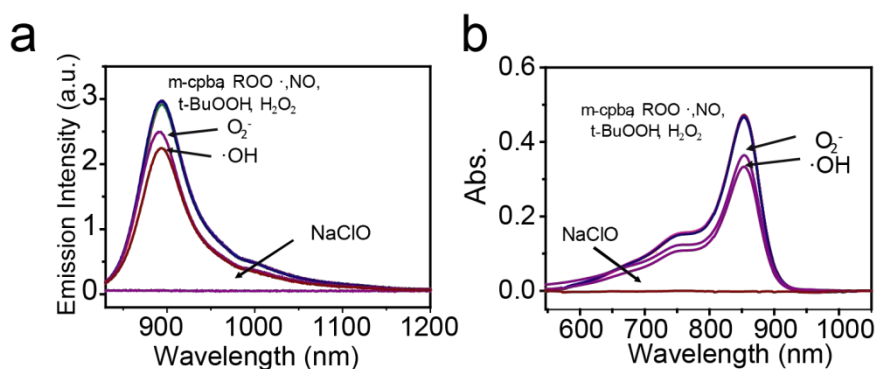

Figure S7. Changes in absorption spectra (a) and fluorescence emission spectra (b) of 3.5 μM solution of Cy860 upon gradual addition of NaClO, m-cpba, H<sub>2</sub>O<sub>2</sub>, ·OH, NO, O<sub>2</sub><sup>-</sup>, ROO·, tBuOOH.

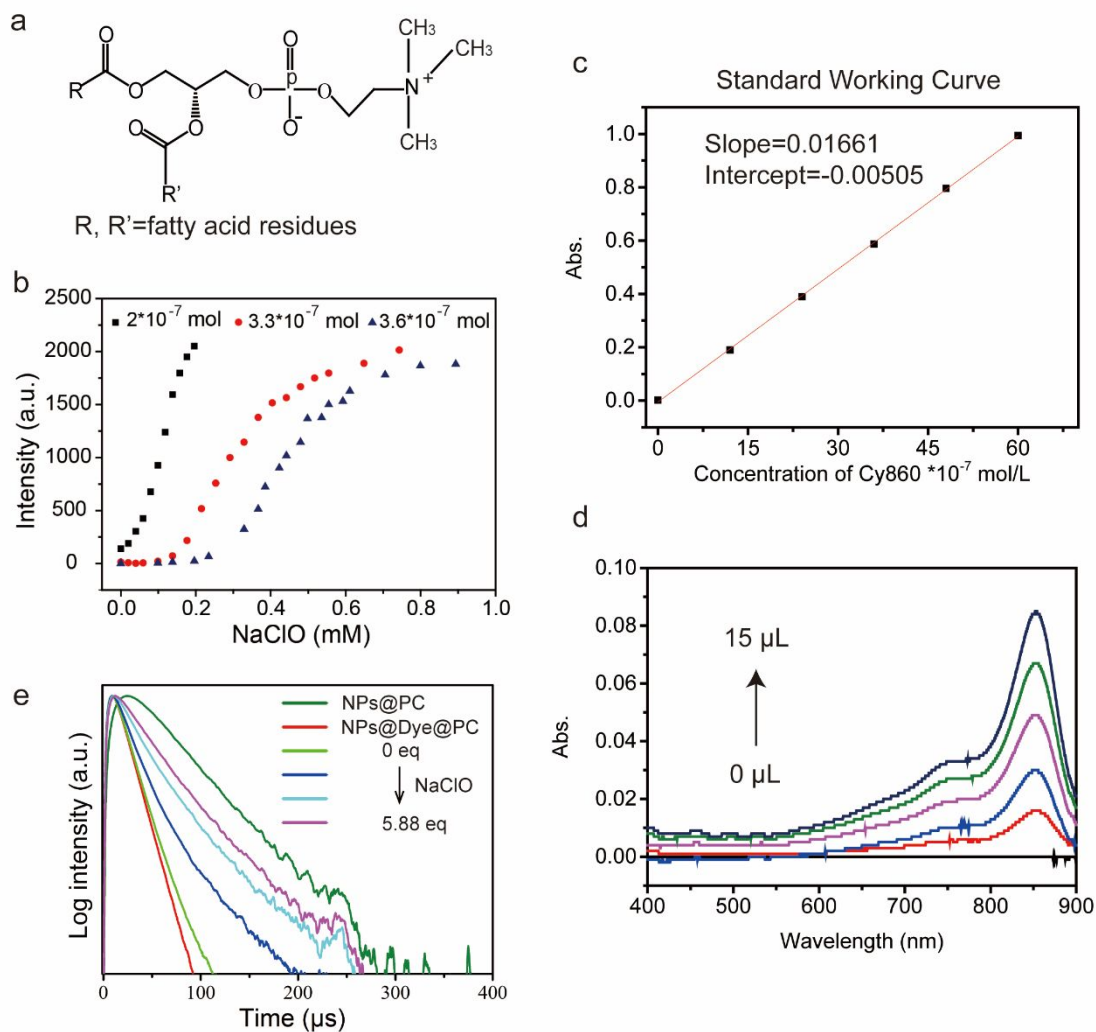

Figure S8. (a) The structural formula of PC. (b) Changes in emission intensity of nanoparticles in nanosystem (OA-  $\text{NaYF}_4$ : Nd-0.1 mmol, Cy860- $2 \times 10^{-7}$  mol,  $3.3 \times 10^{-7}$  mol,  $3.6 \times 10^{-7}$  mol) upon gradual of NaClO tested in TG imaging system with time-gating unit on. (c) The standard working curve of Cy860 in the mixture of EtOH and  $\text{H}_2\text{O}$  (v/v: 1:1). (d) Changes in absorption spectra of the mixture of EtOH and  $\text{H}_2\text{O}$  (v/v: 1:1) upon gradual addition of the supernatant (0, 3, 6, 9, 12, 15  $\mu$ L; the total volume of the supernatant is 2.5 mL). (e) Changes of lifetime of  $\text{Nd}^{3+}$  ions (ex: 808 nm, em: 893 nm) upon gradual addition of NaClO.



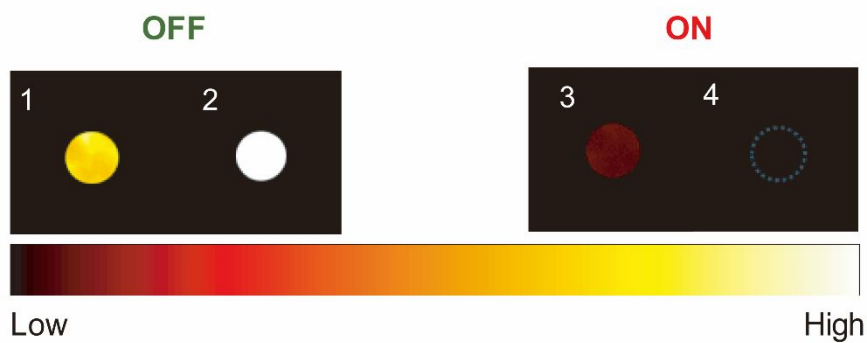

Figure S9. Fluorescence images of Cy860 (2,4) and NaYF<sub>4</sub>:5%Nd (1,3) in TG imaging system with time-gating unit on (3,4) and off (1,2).

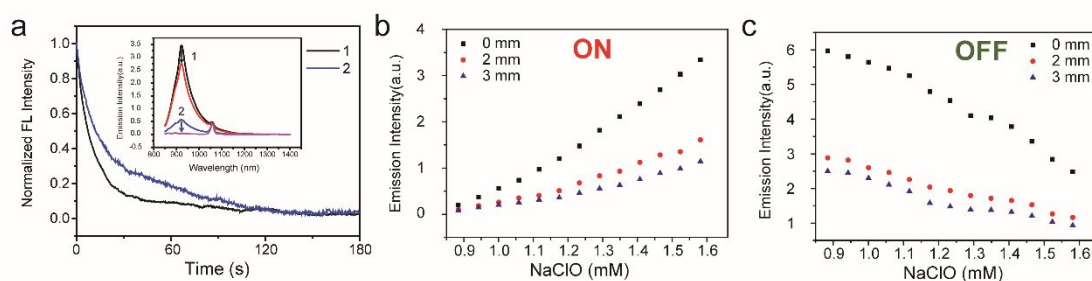

Figure S10. (a) With the addition of NaClO ( $1 \times 10^{-7}$  mol) to composite probe unencapsulated with different amount of Cy860 (1, NaYF<sub>4</sub>: Nd: 0.3 mmol, Cy860:  $0.62 \times 10^{-7}$  mol; 2, NaYF<sub>4</sub>: Nd: 0.3 mmol, Cy860:  $0.12 \times 10^{-7}$  mol), the luminescence of Cy860 decreased. And 3-min was enough for the full reaction. (b-c) The fluorescence intensity of NaYF<sub>4</sub>: Nd@Cy860@PC (0.3 mmol) system in the aqueous solution upon gradual addition of sodium hypochlorite (from 0.88 to 1.58 mmol/L, 300  $\mu$ L in total) measured through tissue of 0 mm, 2 mm, 3 mm (power density: 530 mw/cm<sup>2</sup>). ON state: gain 10, exposure time 5s, duty cycle 40%, phase position: 15°. OFF state: gain 2, exposure time 1s.

| $I_{ON}/I_{OFF}$ | 0 mm (A) | 2 mm (B) | $ (B-A)/A $ | 3 mm (C) | $ (C-A)/A $ |
|------------------|----------|----------|-------------|----------|-------------|
| 1                | 0.34183  | 0.34324  | 0.004125    | 0.31381  | 0.081971    |
| 2                | 0.64457  | 0.6516   | 0.010906    | 0.60131  | 0.067115    |
| 3                | 0.99303  | 0.99337  | 0.000342    | 0.88444  | 0.109352    |
| 4                | 1.34819  | 1.43316  | 0.063025    | 1.20789  | 0.104065    |
| 5                | 1.85131  | 1.79823  | 0.02867     | 1.62992  | 0.119586    |
| 6                | 2.51669  | 2.49679  | 0.00791     | 2.2788   | 0.094525    |
| 7                | 3.25992  | 3.50002  | 0.073652    | 3.11283  | 0.045121    |
| 8                | 4.43312  | 4.63167  | 0.044788    | 3.9908   | 0.099776    |
| 9                | 5.24274  | 5.42328  | 0.034436    | 4.56161  | 0.129919    |
| 10               | 6.32669  | 6.79805  | 0.074503    | 5.71189  | 0.097176    |
| 11               | 8.0197   | 8.39174  | 0.046391    | 7.34272  | 0.084415    |
| 12               | 10.66764 | 10.68116 | 0.001267    | 9.52628  | 0.106993    |
| 13               | 13.48005 | 13.84488 | 0.027064    | 12.25268 | 0.091051    |
| Pearson's r      |          | 0.9994   |             | 0.9997   |             |
| Average          |          |          | 0.0321      |          | 0.0947      |

Figure S11. the ratio values measured through pork (0 mm, 2 mm, 3 mm), the relative deviations and the Pearson correlation coefficient between ratios measured through tissue (2 mm and 3 mm) and ratios measured through tissue of 0 mm.

|                         |                                                   |            |                |
|-------------------------|---------------------------------------------------|------------|----------------|
| Equation                | y = Intercept + B1*x^1 + B2*x^2 + B3*x^3 + B4*x^4 |            |                |
| Weight                  | No Weighting                                      |            |                |
| Residual Sum of Squares | 0.21962                                           | 0.2179     | 0.15164        |
| Adj. R-Square           | 0.99837                                           | 0.99846    | 0.99862        |
|                         |                                                   | Value      | Standard Error |
| 0 mm                    | Intercept                                         | 167.97593  | 70.12377       |
|                         | B1                                                | -601.34476 | 235.79717      |
|                         | B2                                                | 798.54452  | 293.63162      |
|                         | B3                                                | -468.695   | 160.54481      |
|                         | B4                                                | 104.42448  | 32.53344       |
| 2 mm                    | Intercept                                         | 180.79308  | 69.84937       |
|                         | B1                                                | -637.5235  | 234.87448      |
|                         | B2                                                | 833.83936  | 292.48262      |
|                         | B3                                                | -482.24281 | 159.91659      |
|                         | B4                                                | 106.01641  | 32.40614       |
| 3 mm                    | Intercept                                         | 177.52857  | 58.26894       |
|                         | B1                                                | -632.38832 | 195.93431      |
|                         | B2                                                | 835.48386  | 243.99152      |
|                         | B3                                                | -487.45979 | 133.40379      |
|                         | B4                                                | 107.64166  | 27.03348       |

| I <sub>ON</sub> /I <sub>OFF</sub> | the concentration of hypochlorous acid (mmol/L) |          |          | the relative deviation |          |
|-----------------------------------|-------------------------------------------------|----------|----------|------------------------|----------|
|                                   | 0 mm (A)                                        | 2 mm (B) | 3 mm (C) | (B-A)/A                | (C-A)/A  |
| 1                                 | 1.0125                                          | 1.015    | 1.02681  | 0.002469               | 0.014751 |
| 2                                 | 1.12046                                         | 1.11668  | 1.13898  | 0.003374               | 0.014126 |
| 3                                 | 1.20846                                         | 1.19897  | 1.23222  | 0.007853               | 0.014643 |
| 4                                 | 1.28147                                         | 1.26899  | 1.30837  | 0.009739               | 0.016048 |
| 5                                 | 1.34027                                         | 1.32741  | 1.36791  | 0.009595               | 0.018274 |
| 6                                 | 1.38762                                         | 1.37568  | 1.41479  | 0.008605               | 0.020222 |
| 7                                 | 1.42653                                         | 1.4159   | 1.45283  | 0.007452               | 0.02097  |
| 8                                 | 1.45931                                         | 1.45     | 1.48466  | 0.00638                | 0.020396 |
| 9                                 | 1.48754                                         | 1.47944  | 1.51199  | 0.005445               | 0.019206 |
| 10                                | 1.51233                                         | 1.5053   | 1.53595  | 0.004648               | 0.017357 |
| 11                                | 1.53443                                         | 1.52833  | 1.5573   | 0.003975               | 0.015131 |
| 12                                | 1.55438                                         | 1.54909  | 1.57658  | 0.003403               | 0.014282 |
| Average                           |                                                 |          |          | 0.006078               | 0.017381 |

Figure S12. The fitting equation and hypochlorous acid concentration calculated from the fitting equation. We assumed the ratio values are 1, 2, 3, 4.....12.

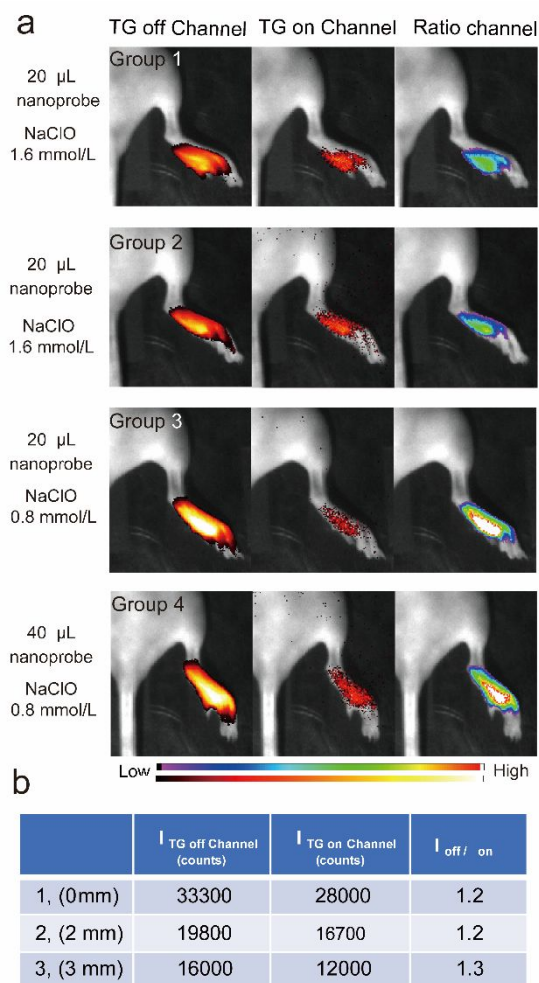

Figure S13. (a) *In vivo* images of living mice with injection of different amount  $NaYF_4:Nd@Cy860@PC$  treated with different concentration of hypochlorite acid (gain 20, exposure time: TG on channel 10 s, TG off channel 5 s).(b) the summary of intensities of capillaries buried in mouse (TG on channel and TG off channel).

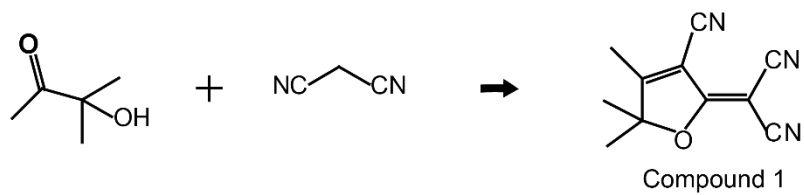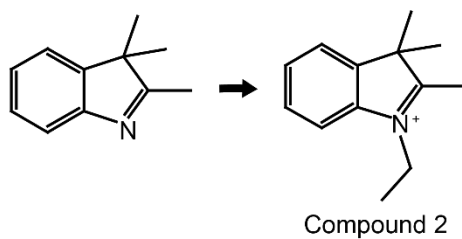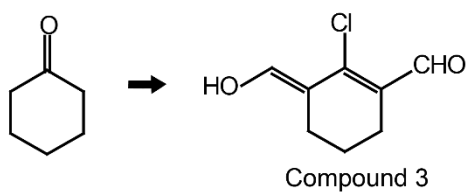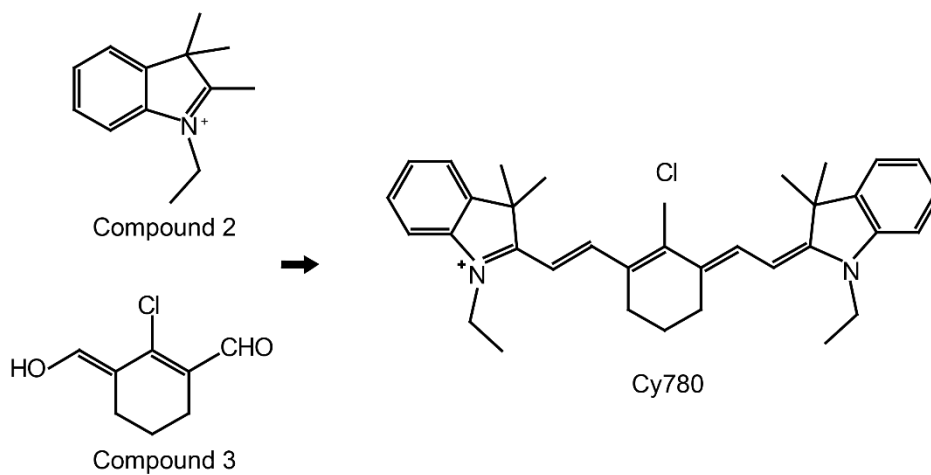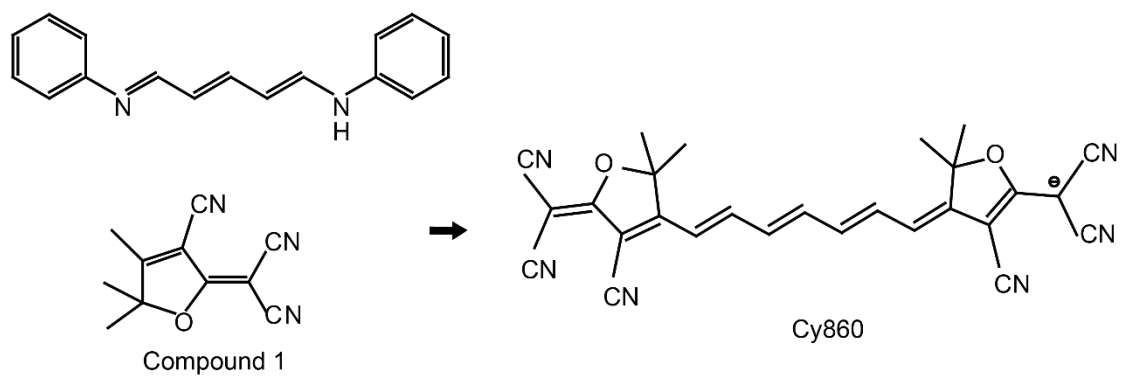

Figure S14. Synthetic route of the compound 1, compound 2, compound 3, Cy780 and Cy860.

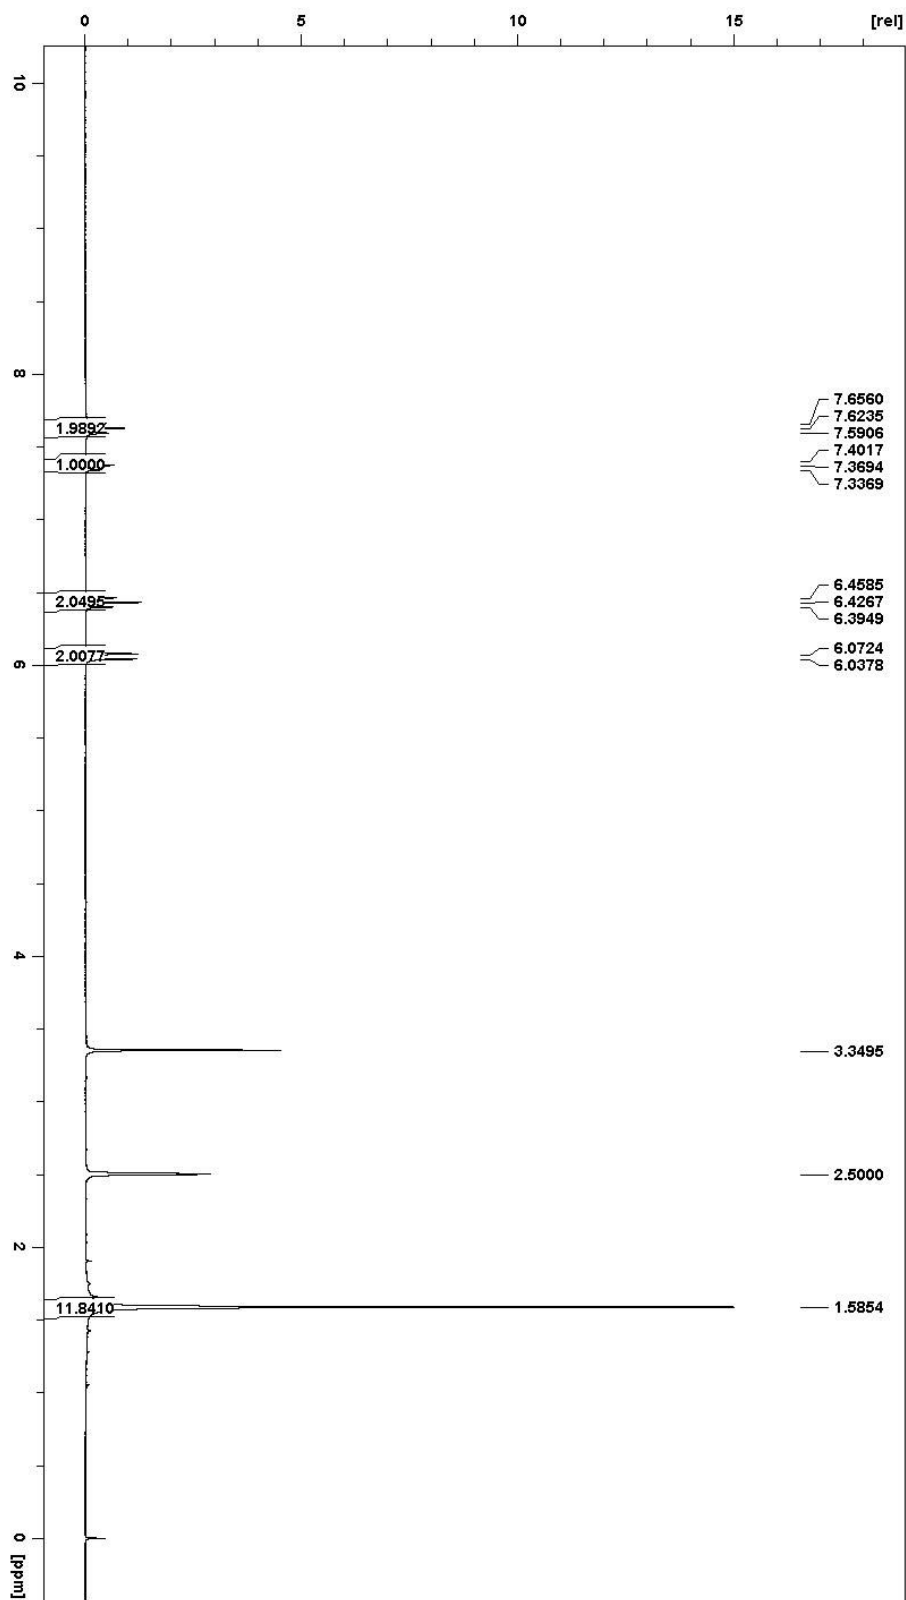

Figure S15. 1H NMR spectra of compound Cy860 in DMSO

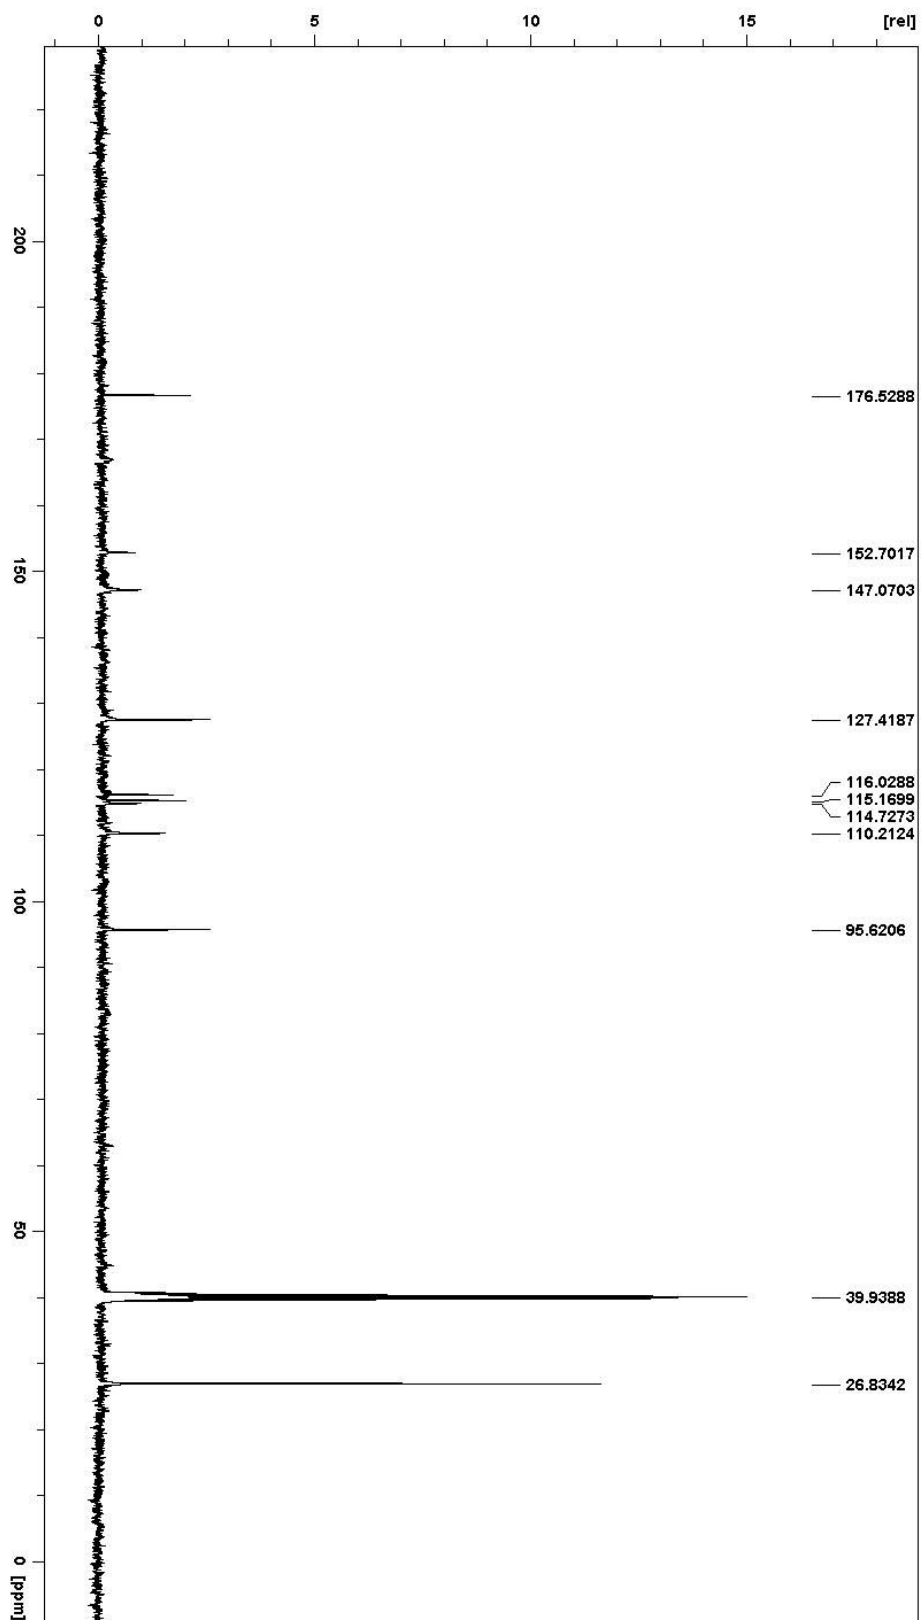

Figure S16. <sup>13</sup>C NMR spectrum of compound Cy860 in DMSO

## REFERENCES

- (1) Ishimaru, A. Transport theory of waves in randomly distributed scatterers.

In *Wave Propagation and Scattering in Random Media*, 2nd ed.; Dudley, D., Ed.; IEEE/OU Press: New York, 1997; pp 145-166.

(2) Niemz, M. H. Light and matter. In *Laser-Tissue Interactions*, 3rd ed.; Greenbaum, E., Ed.; Springer-Verlag Berlin Heidelberg Press: Berlin, Heidelberg, 2003; pp 9-35.
